# Supplementary material
Source: PubMed Central journal article supplement (PMC7477887)
Supplement: NIHMS1622477-supplement-Supplemental_Table_2.pdf [file NIHMS1622477-supplement-Supplemental_Table_2.pdf]

**Table 2. COG Staging vs SEER Summary Stage**

| <b>COG Staging†</b>    |                                                                                                                                                                                                           | <b>SEER Summary Stage*</b> |                                                                                                                           |
|------------------------|-----------------------------------------------------------------------------------------------------------------------------------------------------------------------------------------------------------|----------------------------|---------------------------------------------------------------------------------------------------------------------------|
| <b>Stage I (40%)</b>   | Limited to kidney, intact renal capsule, non-ruptured/biopsied, no RV involvement, negative margins                                                                                                       | <b>Localized (43.2 %)</b>  | Limited to kidney, invasion of renal capsule                                                                              |
| <b>Stage II (20%)</b>  | Extends beyond capsule but negative margins, renal hilar vasculature involvement                                                                                                                          | <b>Regional (32.8%)</b>    | Beyond Gerota's fascia, local invasion of nearby organs, hilar or other major vessels, regional LN (hilar, caval, aortic) |
| <b>Stage III (20%)</b> | Tumor not completely removed confined to the abdomen (local extension into nearby organs that could not be removed, positive margins), LN involvement, renal biopsy, any tumor spill, peritoneal deposits | <b>Distant (22.8%)</b>     | Adrenal (contralateral or non-contiguous ipsilateral), hematogenous spread to other organs, carcinomatosis, distant LN    |
| <b>Stage IV (10%)</b>  | Mets to lung, liver, bone, brain                                                                                                                                                                          | <b>Unknown (1.2%)</b>      |                                                                                                                           |
| <b>Stage V (5%)</b>    | Bilateral                                                                                                                                                                                                 |                            |                                                                                                                           |

†Percentages listed represent reported proportion of patients in each COG stage

\*Percentages listed represent proportion of patients from this study who meet each stage criteria
