# Supplementary material
Source: PubMed Central journal article supplement (PMC7477887)

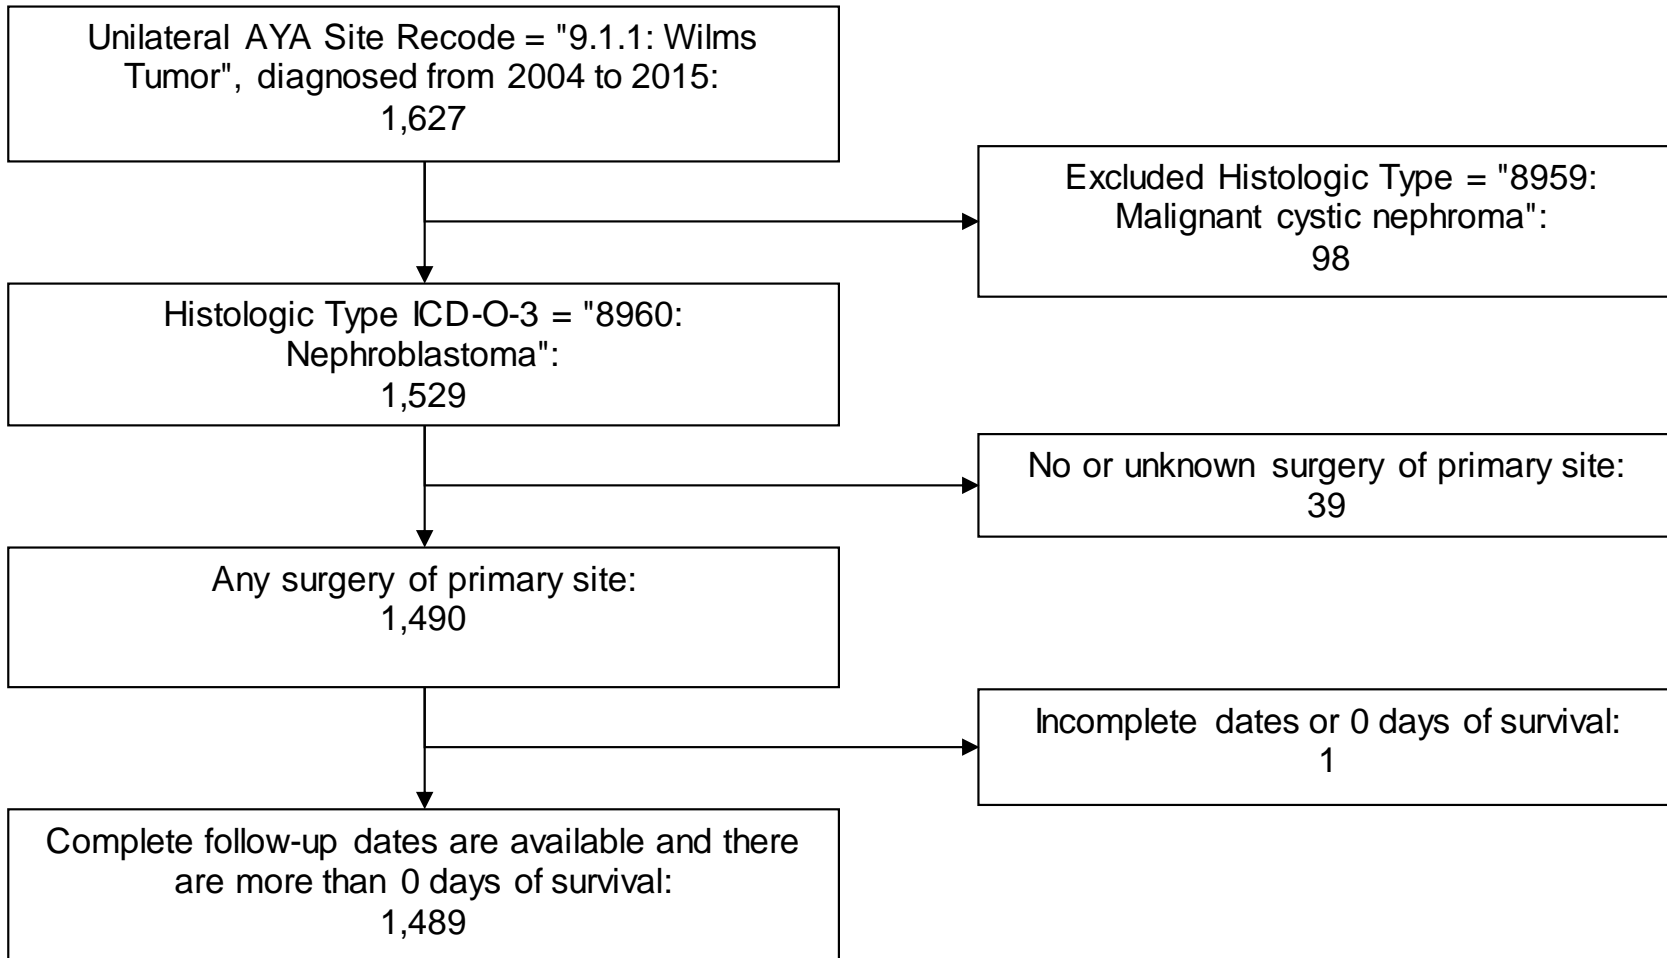

Supplement: NIHMS1622477-supplement-S1.pdf [file NIHMS1622477-supplement-S1.pdf]

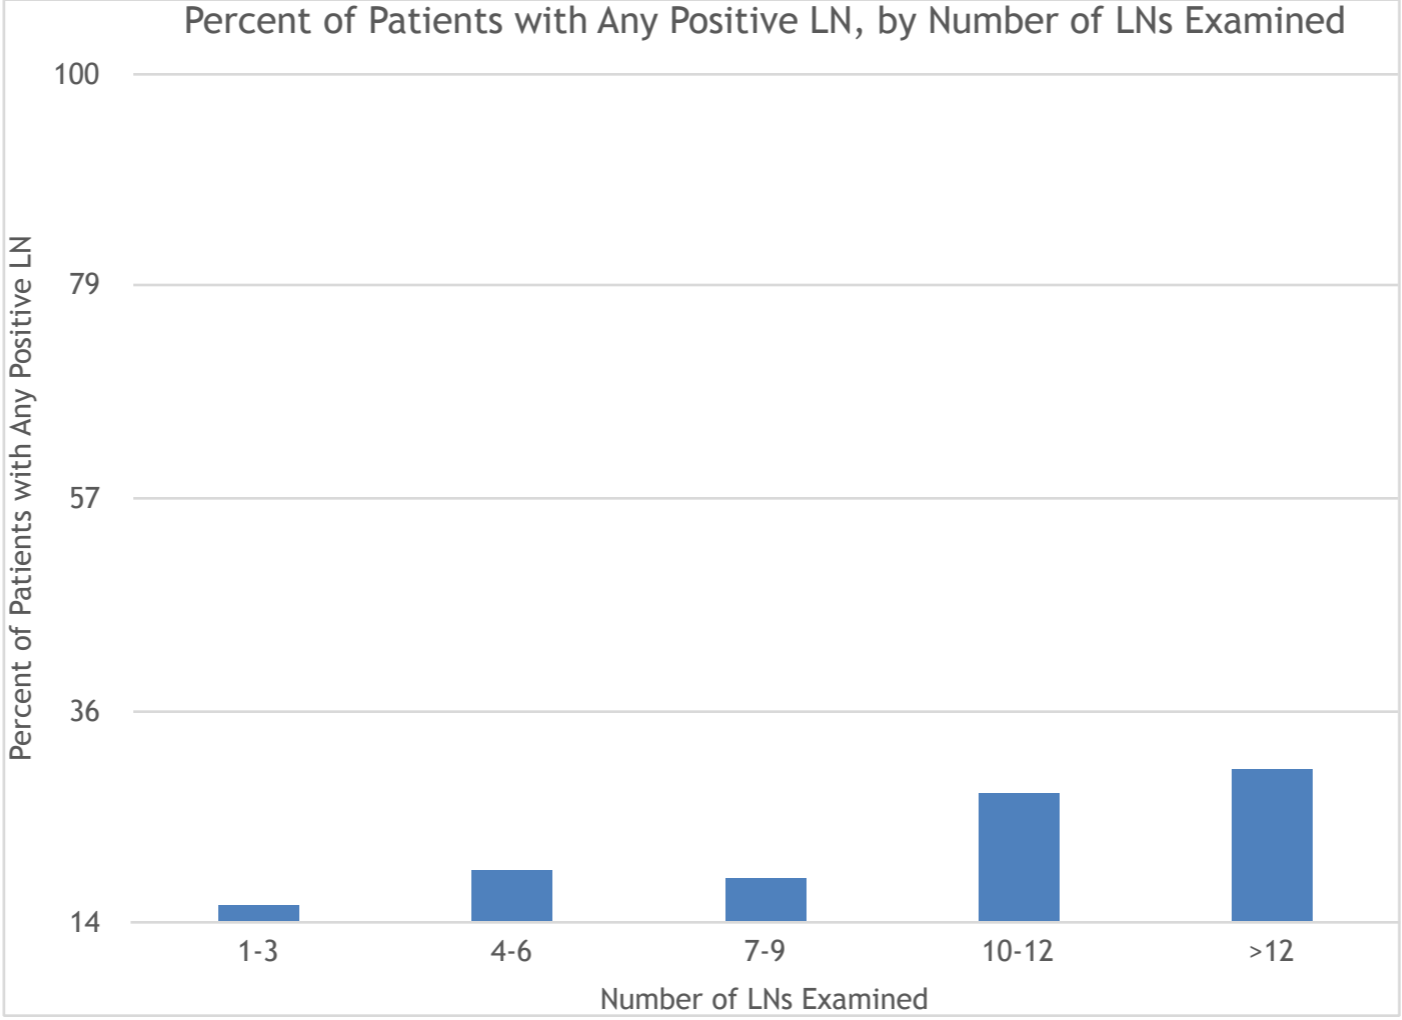

Supplement: NIHMS1622477-supplement-S2.pdf [file NIHMS1622477-supplement-S2.pdf]

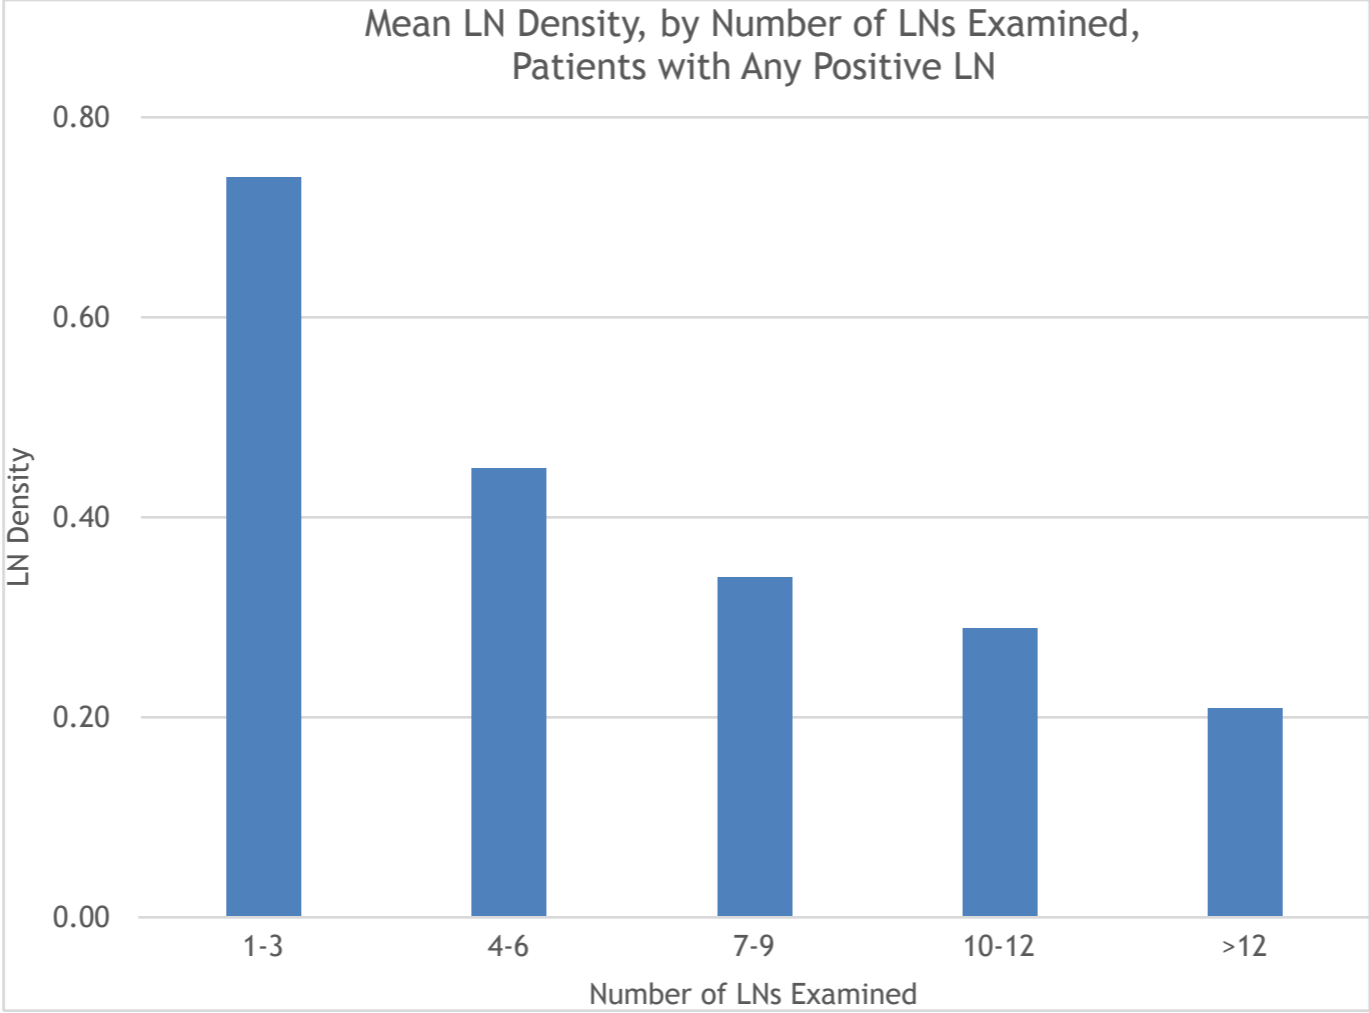

Supplement: NIHMS1622477-supplement-S3.pdf [file NIHMS1622477-supplement-S3.pdf]

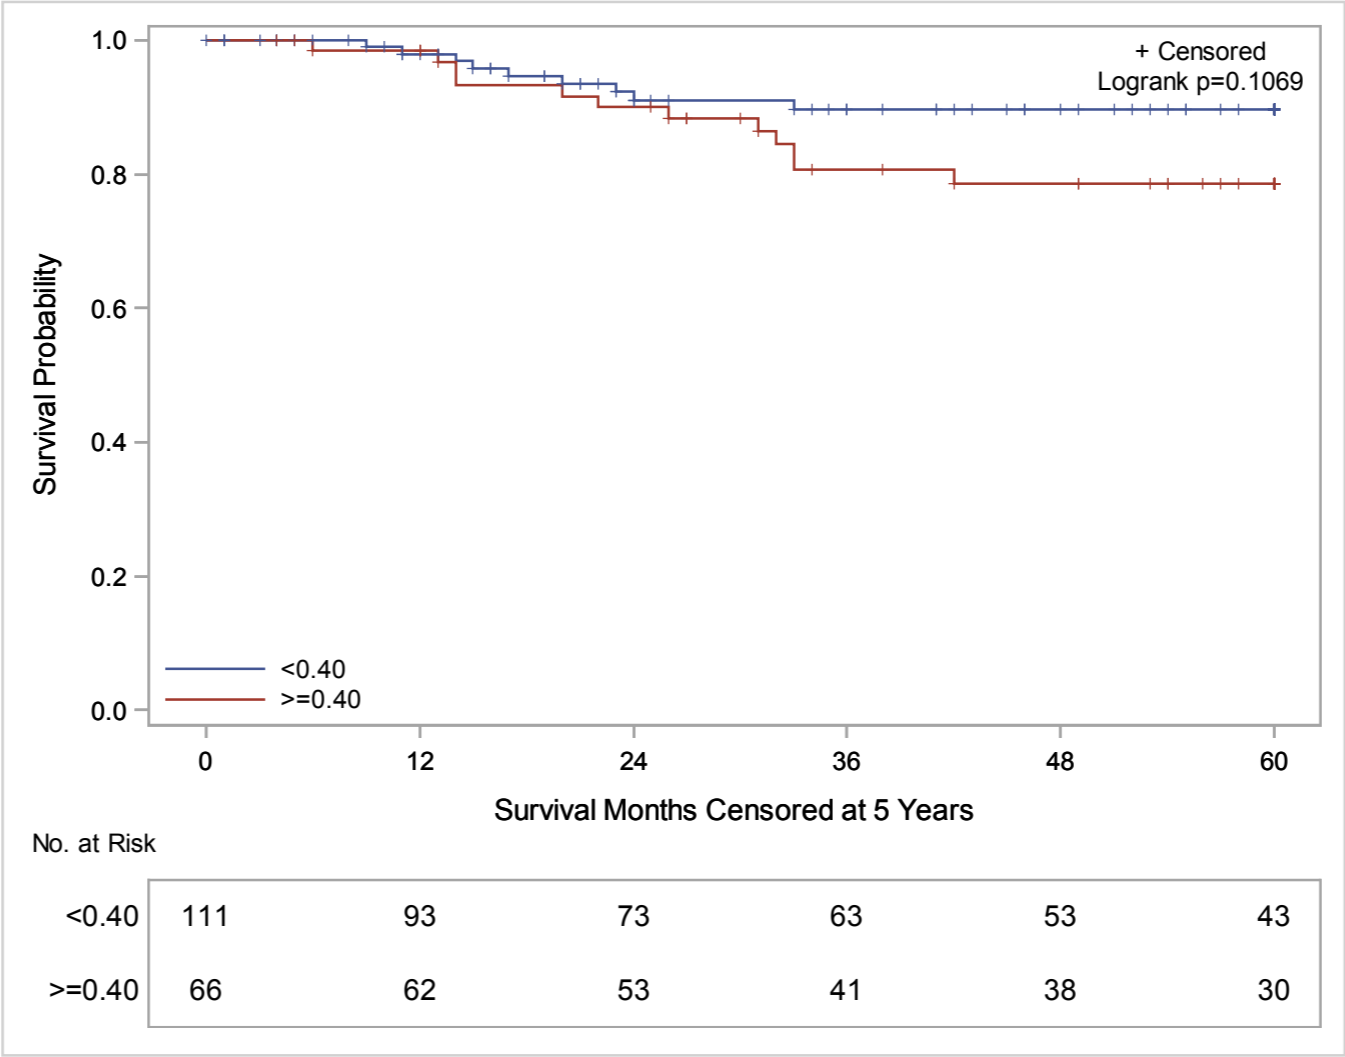

Supplement: NIHMS1622477-supplement-S4.pdf [file NIHMS1622477-supplement-S4.pdf]

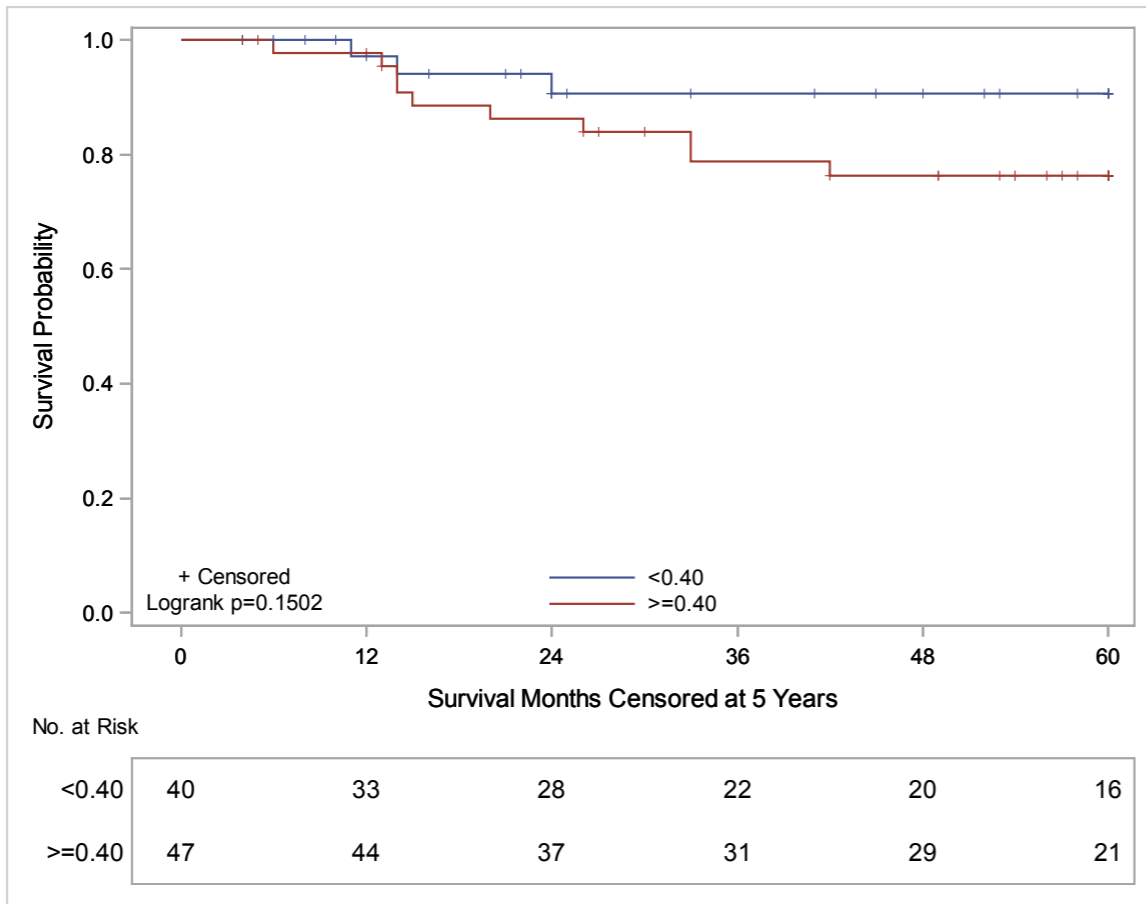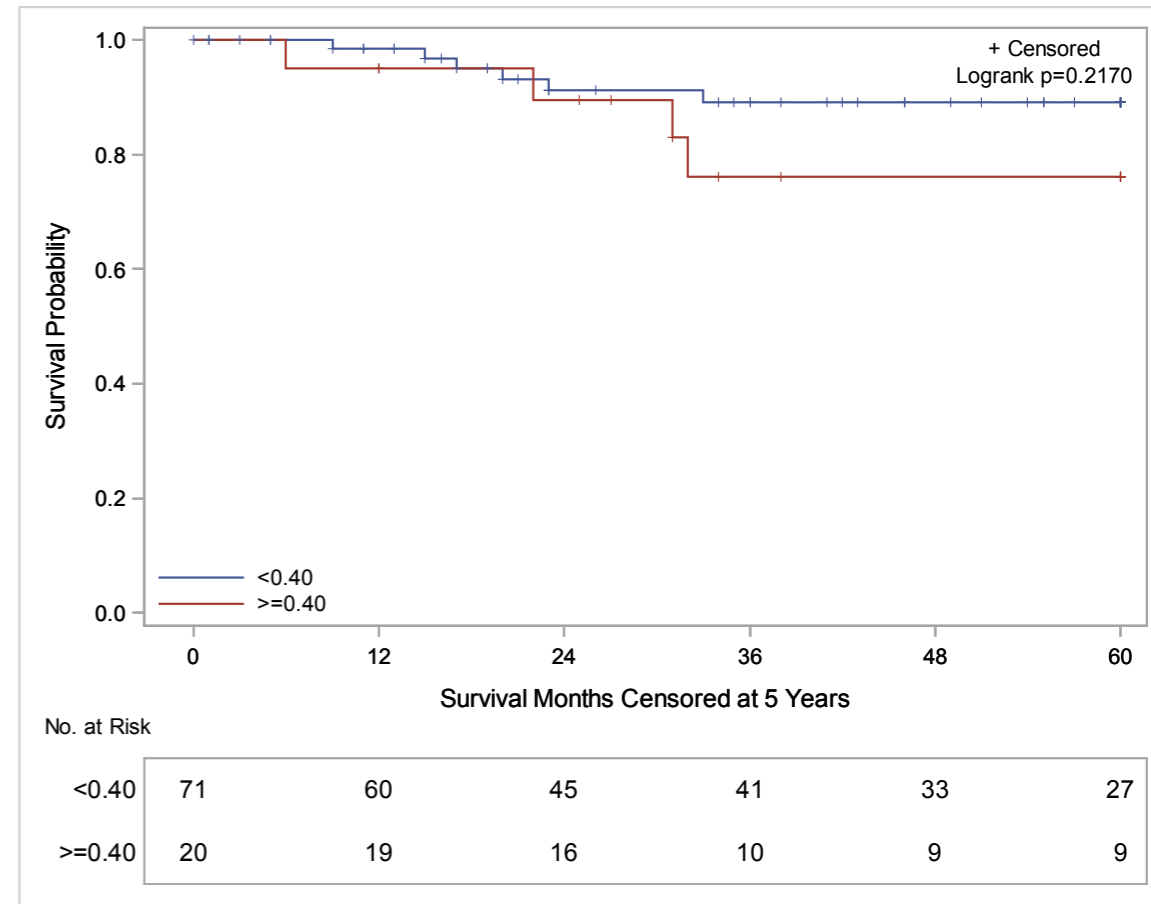

Supplement: NIHMS1622477-supplement-S5.pdf [file NIHMS1622477-supplement-S5.pdf]

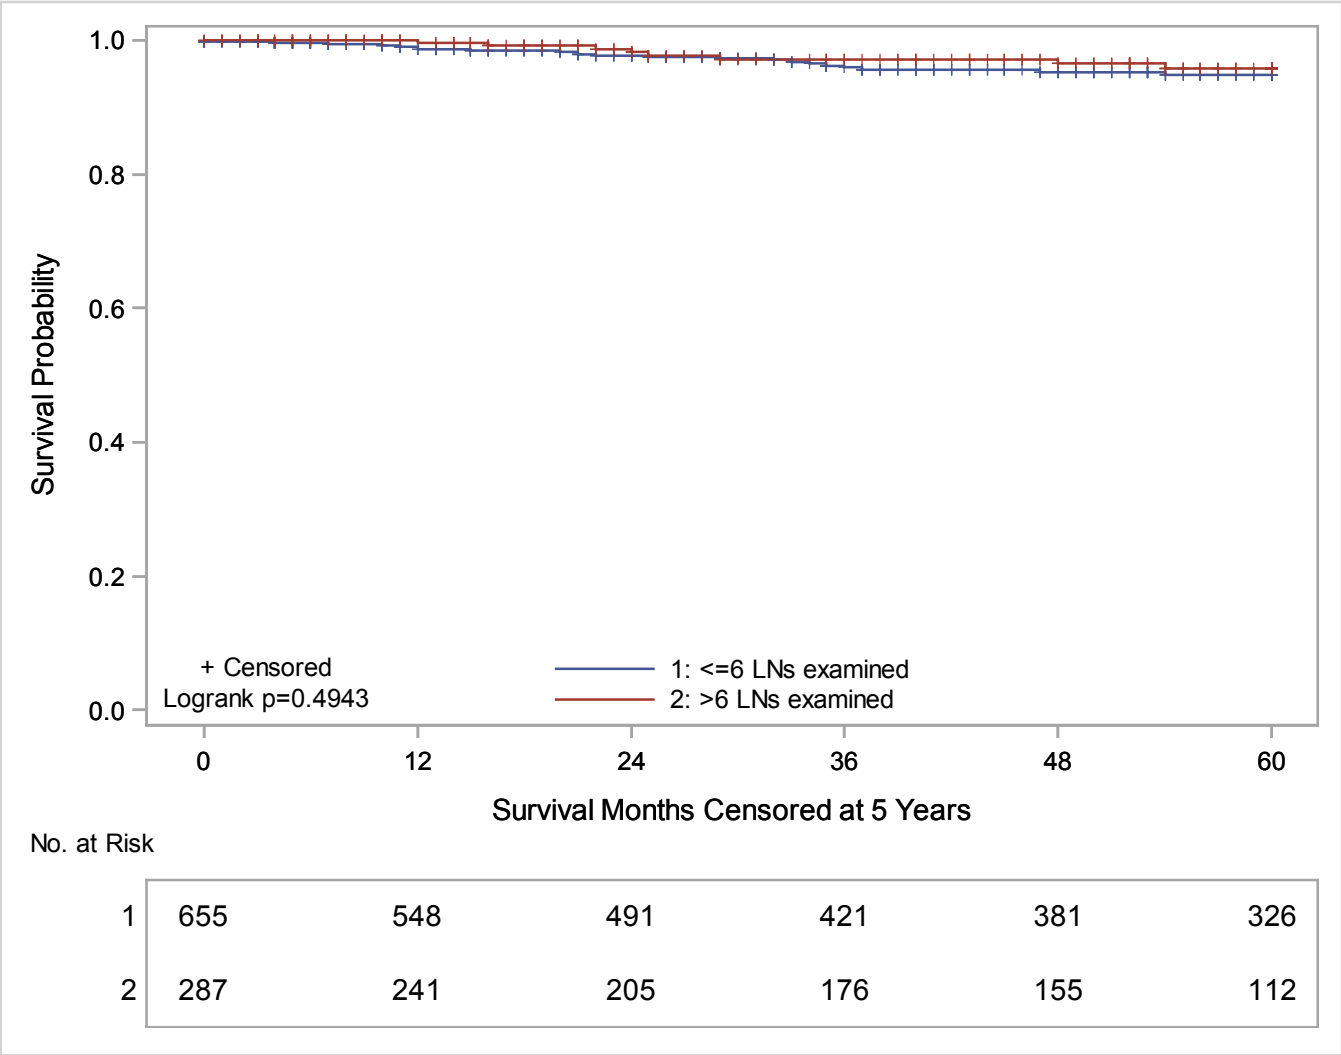

Supplement: NIHMS1622477-supplement-S6.pdf [file NIHMS1622477-supplement-S6.pdf]
